# Supplementary material for: Observation of supersymmetry and its spontaneous breaking in a trapped ion quantum simulator
Source: PubMed Central journal article supplement (PMC9197856; doi:10.1038/s41467-022-31058-0), 2022-06-14
Supplement: 41467_2022_31058_MOESM1_ESM.pdf [file 41467_2022_31058_MOESM1_ESM.pdf]

# Supplementary Information for “Observation of Supersymmetry and its Spontaneous Breaking in a Trapped Ion Quantum Simulator”

M.-L. Cai,<sup>1,2,\*</sup> Y.-K. Wu,<sup>1,\*</sup> Q.-X. Mei,<sup>1</sup> W.-D. Zhao,<sup>1</sup> Y. Jiang,<sup>1</sup> L. Yao,<sup>1,2</sup> L. He,<sup>1</sup> Z.-C. Zhou,<sup>1,3</sup> and L.-M. Duan<sup>1,†</sup>

<sup>1</sup>*Center for Quantum Information, Institute for Interdisciplinary Information Sciences,  
Tsinghua University, Beijing, 100084, PR China*

<sup>2</sup>*HYQ Co., Ltd., Beijing, 100176, PR China*

<sup>3</sup>*Beijing Academy of Quantum Information Sciences, Beijing 100193, PR China*

## SUPPLEMENTARY NOTE 1: SUPERSYMMETRY IN QUANTUM RABI MODEL

A quantum mechanical system is supersymmetric if we can define some Hermitian supercharges  $Q_1, Q_2, \dots, Q_N$  such that  $\{Q_i, Q_j\} = 2H\delta_{ij}$ , where  $H$  is the Hamiltonian of the system [1]. By definition, all the supercharges commute with  $H = Q_i^2$ , so that  $Q_i$ 's are conserved quantities.

The simplest case is the  $N = 2$  SUSY QM with two supercharges. Here we can define a Witten parity operator  $K$  satisfying  $K^2 = I$  and  $\{K, Q_i\} = 0$  ( $i = 1, 2$ ). It can be shown that for the  $N = 2$  SUSY QM we can choose  $Q_2 = \pm iKQ_1$ , so that we only need to consider one supercharge [1]. From the above definitions, we can see that  $[H, K] = 0$ , hence  $K$  is also conserved. We can thus split the whole Hilbert space into  $\mathcal{H} = \mathcal{H}_+ \oplus \mathcal{H}_-$  where  $\mathcal{H}_\pm$  is the eigenspace of  $K$  with eigenvalue  $\pm 1$  which corresponds to the bosonic and the fermionic states, respectively.

Now we consider the QRM model [Eq. (1) of the main text], which is supersymmetric at two sets of parameters [2]:  $g = 0$  and  $\omega_s = \omega$ ; or  $\omega_s = 0$ .

### A. $g = 0$ and $\omega_s = \omega$

In this case, the Hamiltonian  $H = \omega\sigma_z/2 + \omega(a^\dagger a + 1/2)$  is just a spin and a bosonic mode without any interaction. It is easy to check that  $Q = \sqrt{\omega}(a\sigma_+ + a^\dagger\sigma_-)$  and  $K = \sigma_z$  satisfy all the above definitions. Here we can see that the spin-up and the spin-down states with different phonon numbers give the whole spectrum of the bosonic and the fermionic states, and the mapping from spin-up/spin-down to bosonic/fermionic states is arbitrary: We can simply define  $K \rightarrow -K$  to reverse the Witten parity operator.

Let us choose  $|\downarrow\rangle|n\rangle$  as the bosonic states and  $|\uparrow\rangle|n\rangle$  as the fermionic states. Here we have a unique ground state  $|\downarrow\rangle|0\rangle$  with energy  $E_0 = 0$ , and the higher levels  $|\downarrow\rangle|n+1\rangle$  and  $|\uparrow\rangle|n\rangle$  are degenerate with energy  $E_{n+1} = (n+1)\hbar\omega$  ( $n = 0, 1, \dots$ ). The supercharge  $Q$  transforms the degenerate bosonic and fermionic states into each other with a nonzero normalization factor, and it annihilates the unique ground state.

### B. $\omega_s = 0$

In this case the Hamiltonian is given by

$$H = \omega \left( a^\dagger a + \frac{1}{2} \right) + g\sigma_x(a + a^\dagger) + \frac{g^2}{\omega}. \quad (1)$$

To demonstrate the SUSY structure more clearly, we follow Ref. [2] to perform a unitary transform

$$U_g = \frac{1}{\sqrt{2}} \begin{pmatrix} V_- & -V_+ \\ V_- & V_+ \end{pmatrix}, \quad (2)$$

where  $V_\pm = \exp[\pm g/\omega(a^\dagger - a)] = D(\pm g/\omega)$  is the displacement operator of  $\pm g/\omega$ . It is straightforward to verify that

$$U_g^\dagger H U_g = \omega I \otimes \left( a^\dagger a + \frac{1}{2} \right). \quad (3)$$

---

\* These authors contribute equally to this work

† [lmduan@mail.tsinghua.edu.cn](mailto:lmduan@mail.tsinghua.edu.cn)

A supercharge in this transformed frame can be given by

$$U_g^\dagger Q U_g = \sigma_x \otimes \sqrt{\omega(a^\dagger a + 1/2)}, \quad (4)$$

with the Witten parity operator  $U_g^\dagger K U_g = \sigma_z \otimes I$ . Moving back to the original frame, we get

$$\begin{aligned} Q &= U_g \sigma_x \otimes \sqrt{\omega(a^\dagger a + 1/2)} U_g^\dagger \\ &= -\frac{\sigma_z}{2} \otimes \left[ V_+ \sqrt{\omega(a^\dagger a + 1/2)} V_+ + V_- \sqrt{\omega(a^\dagger a + 1/2)} V_- \right] \\ &\quad - i \frac{\sigma_y}{2} \otimes \left[ V_+ \sqrt{\omega(a^\dagger a + 1/2)} V_+ - V_- \sqrt{\omega(a^\dagger a + 1/2)} V_- \right], \end{aligned} \quad (5)$$

and  $K = \sigma_x$ . In the main text, we have taken out the factor  $\sqrt{\omega}$  from the definition of  $Q$  to make it dimensionless. Then we have  $H = \omega Q^2$ .

The ground state in the transformed frame has energy  $E_0 = \omega/2$  when the phonon number is zero. If we further require the states to be the eigenstates of  $Q$ , we see that, in the transformed frame, the two ground states can be chosen as  $|\pm\rangle|0\rangle$ , with eigenvalues of  $\pm 1/\sqrt{2}$  for the supercharge. Now if we move back to the original frame, the two ground states can be expressed as  $U_g|\pm\rangle|0\rangle = (|+\rangle - g/\omega \mp |-\rangle|g/\omega\rangle)/\sqrt{2}$ .

## SUPPLEMENTARY NOTE 2: COMPLETE EXPERIMENTAL DATA FOR PARTIAL SPIN-PHONON STATE TOMOGRAPHY

In Supplementary Figure 1, Supplementary Figure 2, Supplementary Figure 3 and Supplementary Figure 4 we present the complete experimental data for measuring the joint spin-phonon state by projecting  $|\psi_\pm\rangle$  onto  $\sigma_z = \pm 1$  or  $\sigma_y = \pm 1$ , as well as the theoretical results for the best fitted joint density matrices.

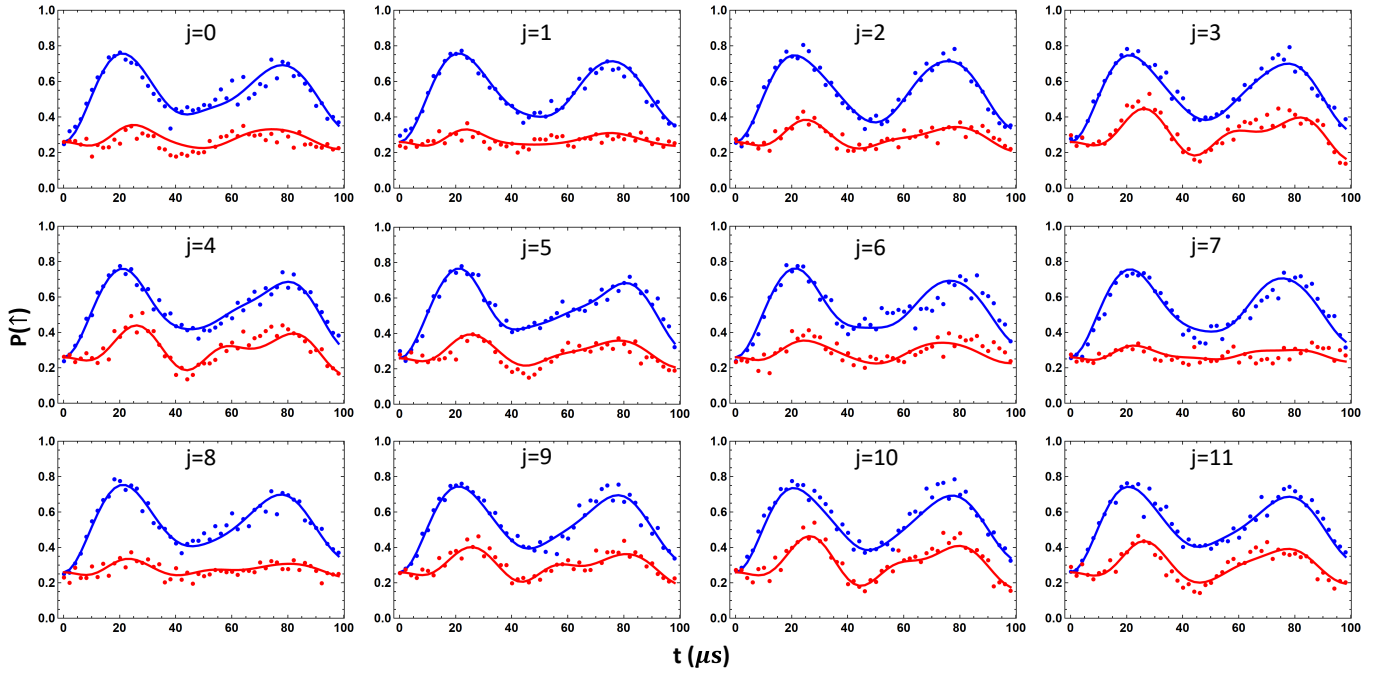

Supplementary Figure 1. Experimental data (dots) and the theoretical prediction based on the best-fitted density matrix (solid curves) when driving the blue or red sidebands for the  $|\psi_-\rangle$  state projected to  $\sigma_z = \pm 1$ . We choose  $\omega = 2\pi \times 10$  kHz and  $g_m = 2\pi \times 5.43$  kHz. The displacement operators  $D(\beta_j)$  are characterized by  $\beta_j = i\beta e^{2\pi i j/N}$  where  $\beta = 0.687$ ,  $N = 12$  and  $j = 0, 1, \dots, N - 1$ .

In Supplementary Figure 5 and Supplementary Figure 6 we present the experimental data used to calibrate a phonon state rotation angle between the measurement of  $|\psi_+\rangle$  and  $|\psi_-\rangle$  as described in Methods.

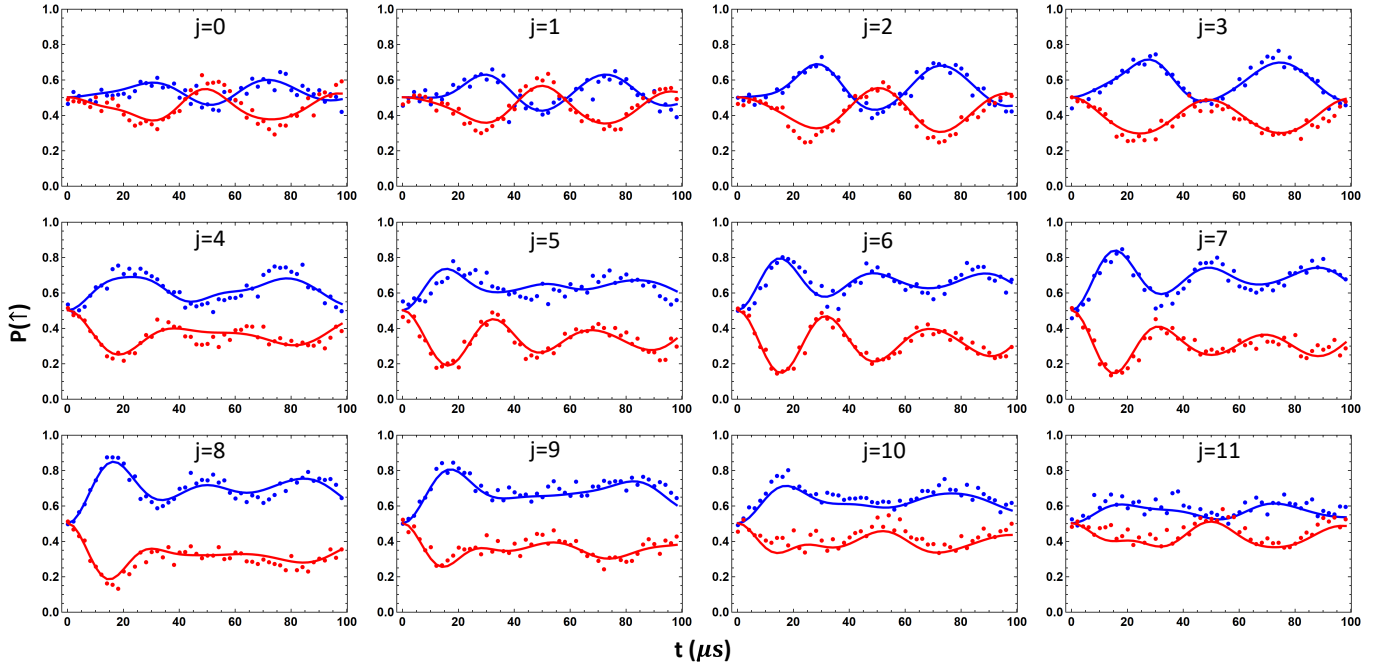

Supplementary Figure 2. Experimental data (dots) and the theoretical prediction based on the best-fitted density matrix (solid curves) when driving the blue or red sidebands for the  $|\psi_{-}\rangle$  state projected to  $\sigma_y = \pm 1$ . We choose  $\omega = 2\pi \times 10$  kHz and  $g_m = 2\pi \times 5.43$  kHz. The displacement operators  $D(\beta_j)$  are characterized by  $\beta_j = i\beta e^{2\pi i j/N}$  where  $\beta = 0.687$ ,  $N = 12$  and  $j = 0, 1, \dots, N - 1$ .

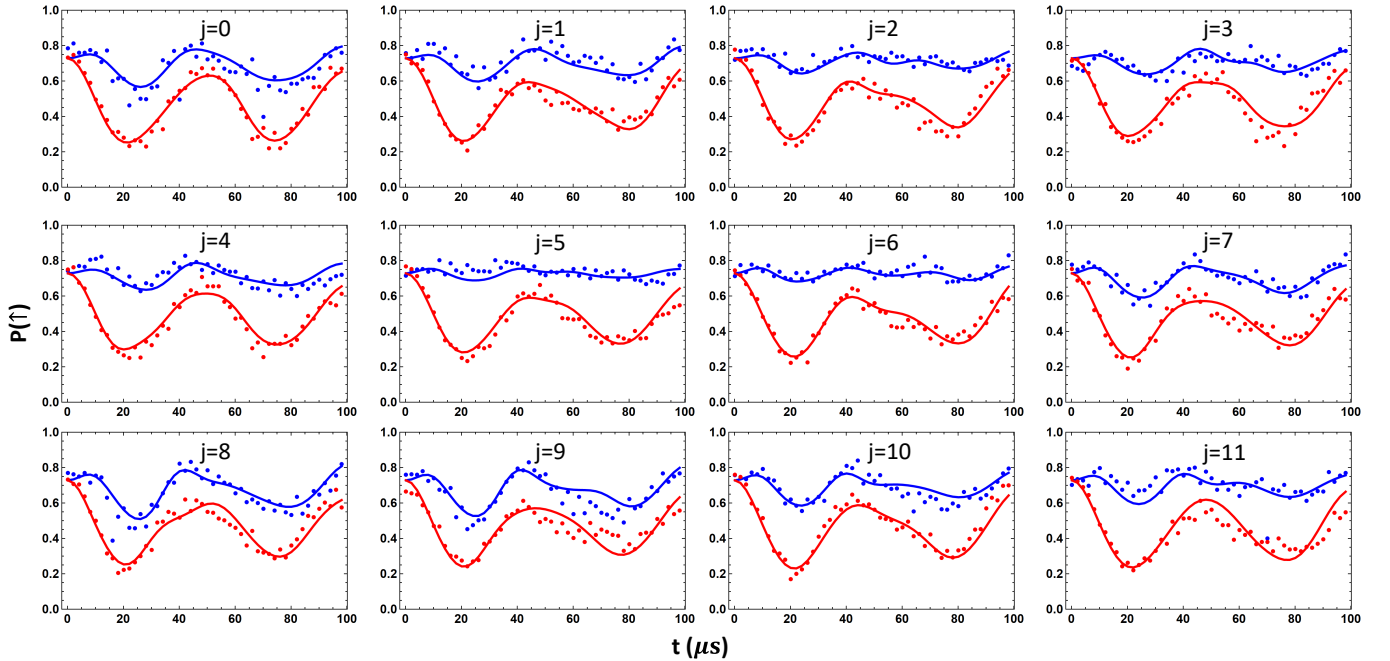

Supplementary Figure 3. Experimental data (dots) and the theoretical prediction based on the best-fitted density matrix (solid curves) when driving the blue or red sidebands for the  $|\psi_{+}\rangle$  state projected to  $\sigma_z = \pm 1$ . We choose  $\omega = 2\pi \times 10$  kHz and  $g_m = 2\pi \times 5.43$  kHz. The displacement operators  $D(\beta_j)$  are characterized by  $\beta_j = i\beta e^{2\pi i j/N}$  where  $\beta = 0.687$ ,  $N = 12$  and  $j = 0, 1, \dots, N - 1$ .

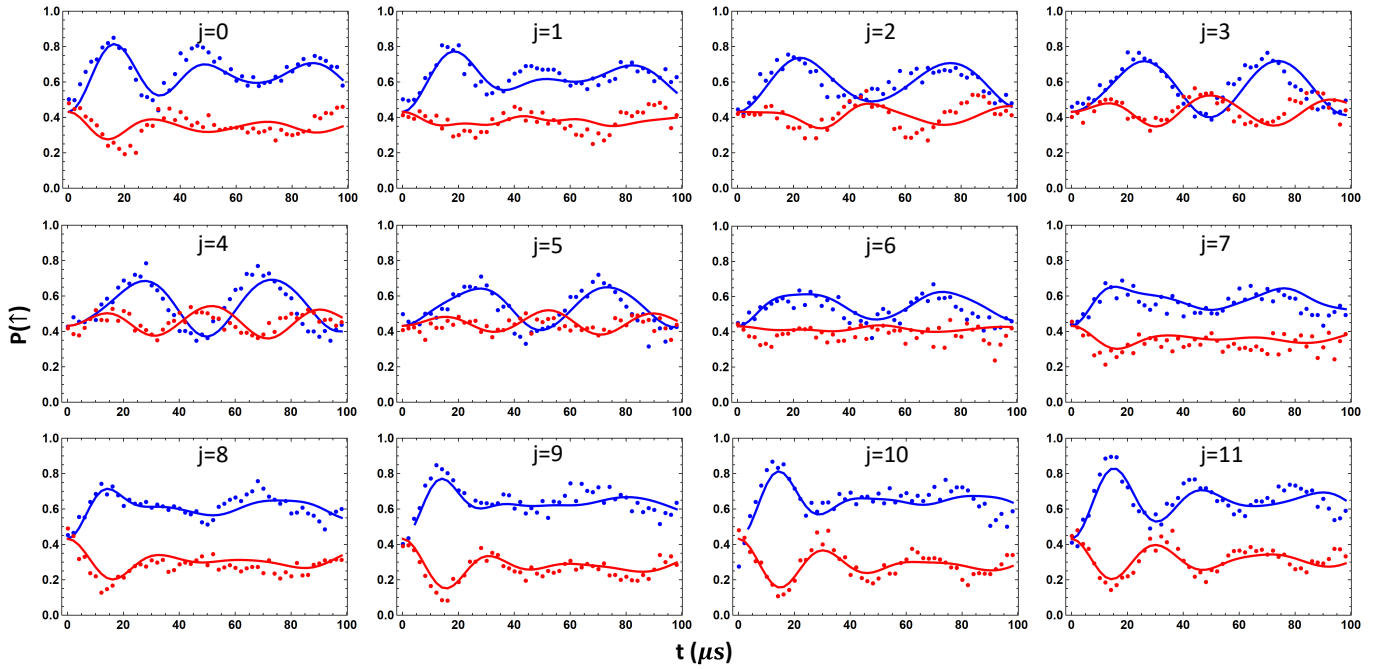

Supplementary Figure 4. Experimental data (dots) and the theoretical prediction based on the best-fitted density matrix (solid curves) when driving the blue or red sidebands for the  $|\psi_+\rangle$  state projected to  $\sigma_y = \pm 1$ . We choose  $\omega = 2\pi \times 10$  kHz and  $g_m = 2\pi \times 5.43$  kHz. The displacement operators  $D(\beta_j)$  are characterized by  $\beta_j = i\beta e^{2\pi i j/N}$  where  $\beta = 0.687$ ,  $N = 12$  and  $j = 0, 1, \dots, N - 1$ .

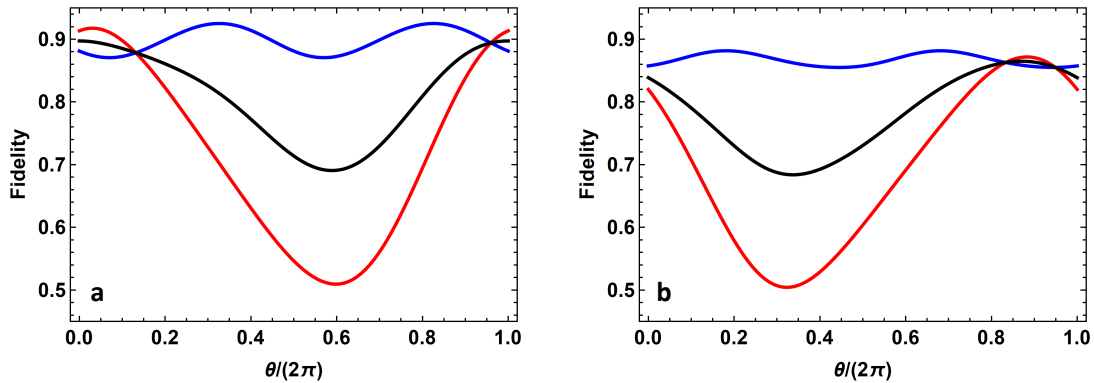

Supplementary Figure 5. Fidelity for the spin-phonon state projected to  $\sigma_z = \pm 1$  (blue),  $\sigma_y = \pm 1$  (red) and their average (black) for **a**  $|\psi_-\rangle$  and **b**  $|\psi_+\rangle$ .

- 
- [1] Combescure, M., Gieres, F. & Kibler, M. Are  $N=1$  and  $N=2$  supersymmetric quantum mechanics equivalent? *Journal of Physics A: Mathematical and General* **37**, 10385–10396 (2004).
- [2] Hirokawa, M. The Rabi model gives off a flavor of spontaneous SUSY breaking. *Quantum Studies: Mathematics and Foundations* **2**, 379–388 (2015).

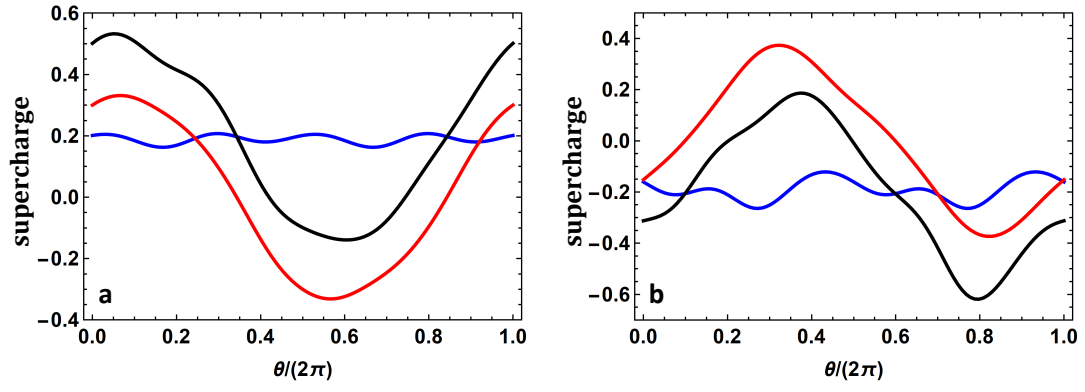

Supplementary Figure 6. Expectation values for  $\sigma_z \otimes A$  (blue),  $\sigma_y \otimes B$  (red) and the total supercharge (black) for **a**  $|\psi_-\rangle$  and **b**  $|\psi_+\rangle$ .
